# Supplementary material for: Identification of epigenetically regulated genes that predict patient outcome in neuroblastoma
Source: BMC Cancer. 2011 Feb 11;11:66. doi: 10.1186/1471-2407-11-66 (PMC3045360; doi:10.1186/1471-2407-11-66)
Supplement: Additional file 2 — Number of genes affected by treatments in at least one cell line. [file 1471-2407-11-66-S2.XLS]

## Sheet: Blad1
Additional file 2. Number of genes affected by treatments in at least one cell line
	No of genes (CpG sites)
Criterias	5-Aza-dC	5-Aza-dC/TSA	Common for both treatments
1-2	244 (397)	593 (875)	143
1-3	215 (341)	510 (528)	135
1-4	177 (273)	351 (543)	108
Criterias
1. Expression fold change >2
2. Methylation betavalue of >0.6 in cell line
3. Methylation betavalue of >0.6 in primary NB
4. Low/abscent expression value in untreated cell lines
